# Supplementary material for: A covalent organic polymer containing nitrogen and oxygen groups with high adsorption capacity and selectivity for gold ions under strongly acidic conditions
Source: Royal Society of Chemistry journal article supplement (doi:10.1039/d3nj00902e), 2023-01-01
Supplement: d3nj00902e1.pdf [file d3nj00902e1.pdf]

## Supporting information

### Instrumentation

Scanning electron microscopy (SEM, Zeiss Sigma300, UK) and elemental analysis (EDS) were used to detect the morphology and surface elements before and after adsorption. Powder X-ray diffractometer (PXRD, D/max-2500, Japan) was used to detect the morphology and structure of the material before adsorption and the loaded ion composition after adsorption. The specific surface area and micropore analyzer (BET, ASAP 2020 HD88, USA) were used to detect the specific surface area of the materials. XPS, Thermo Scientific K-Alpha, USA were used to characterize the elemental composition of the material. Au concentration was determined by atomic absorption spectrometer (AAS, AA6880, Japan). The zeta potential of the material was detected by PALS instrument. The differential thermogravimetric analyzer (DS-TGA, STA 449 F5,DE) was used to detect the thermal stability of the materials, and the Fourier infrared spectrometer (FT-IR, Avatar 370, USA) was used to detect the structural groups of the materials.

### Figure caption:

Figure S1. The SEM-EDS analysis of N-TPCOP

Figure S2. Adsorption of gold ions by N-TPCOP at different concentrations of hydrochloric acid

Figure S3. Adsorption of low concentration gold by N-TPCOP

Figure S4. The N-TPCOP was compared before and after adsorption and desorption

Figure S5. Infrared comparison of N-TPCOP before adsorption, after adsorption and after desorption

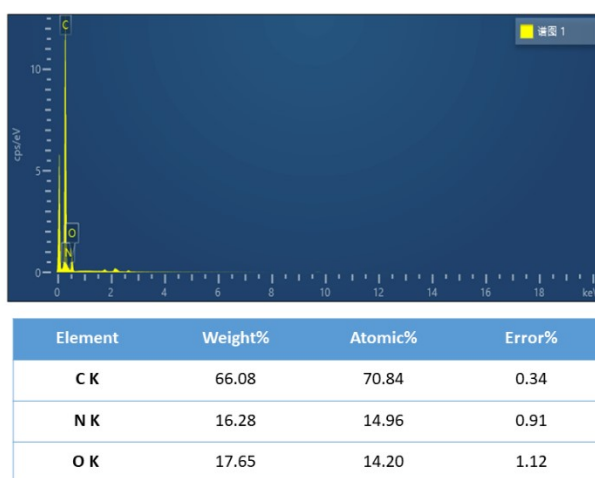

Figure S1. The SEM-EDS analysis of N-TPCOP

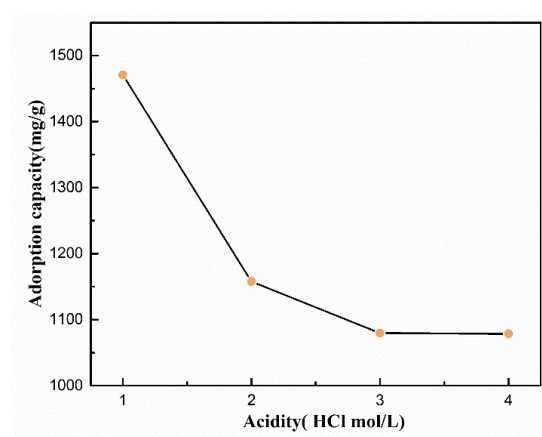

Figure S2. Adsorption of gold ions by N-TPCOP at different concentrations of hydrochloric acid

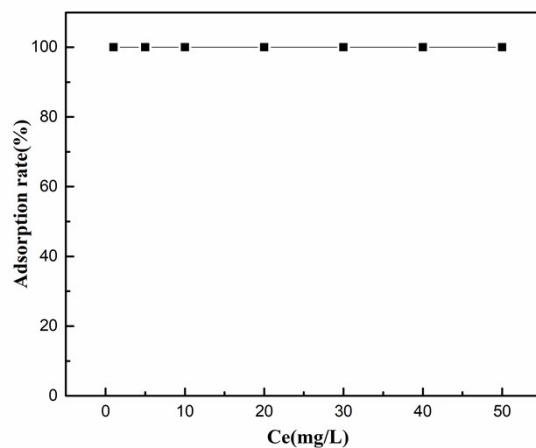

**Figure S3.** Adsorption of low concentration gold by N-TPCOP

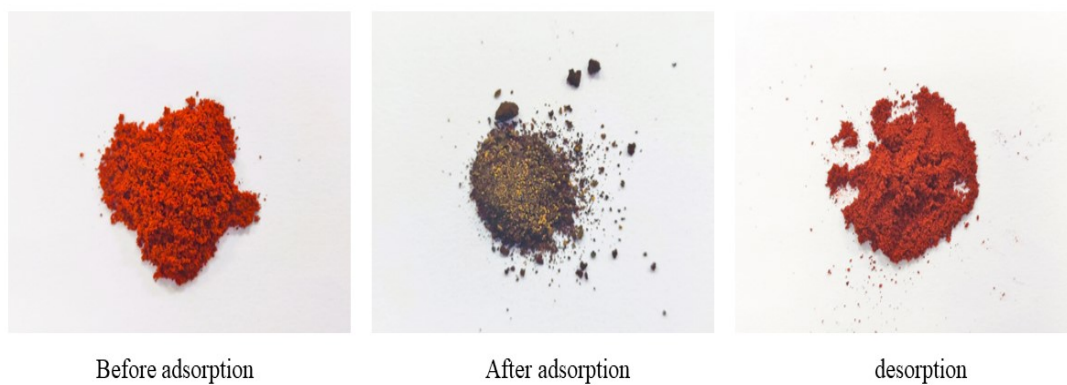

**Figure S4.** The N-TPCOP was compared before and after adsorption and desorption

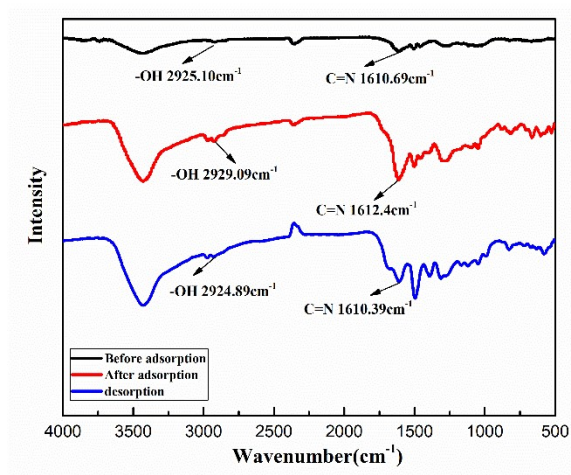

**Figure S5.** Infrared comparison of N-TPCOP before adsorption, after adsorption and after desorption

**Table caption:**Table S1  $K_Q$  and  $K$  values of N-TPCOP for mixed ions

Table S2 Compare with previously reported material

Table S1  $K_Q$  and  $K$  values of N-TPCOP for mixed ions

| <b>Metal ions</b> | <b><math>K_Q</math>(mg/L)</b> | <b>K</b> |
|-------------------|-------------------------------|----------|
| Au <sup>3+</sup>  | 282.74                        | ---      |
| Pb <sup>2+</sup>  | 0.31                          | 914.4978 |
| Cu <sup>2+</sup>  | 0.047                         | 5952.75  |
| Ni <sup>2+</sup>  | 0.017                         | 16273.6  |
| Co <sup>2+</sup>  | 0.034                         | 8185.688 |

Table S2 Compare with previously reported material

| <b>absorbents</b>      | <b><math>q_{max}</math>(mg/g)</b> | <b>Number of cycles</b> | <b>adsorption rate after the cycle(%)</b> | <b>Ref</b>       |
|------------------------|-----------------------------------|-------------------------|-------------------------------------------|------------------|
| <b>N-TPCOP</b>         | <b>3400.38</b>                    | <b>5</b>                | <b>87.7</b>                               | <b>This work</b> |
| CS-GTU                 | 695.63                            | 5                       | 87.19                                     | 55               |
| <b>N-TPCOP</b>         | <b>3400.38</b>                    | <b>4</b>                | <b>90.6</b>                               | <b>This work</b> |
| IM-TUCS                | 933.2                             | 4                       | 93                                        | 44               |
| CS-MoS <sub>2</sub> -1 | 2012.46                           | 4                       | 71.8                                      | 45               |
| CS-MoS <sub>2</sub> -2 | 2611.32                           | 4                       | 80.9                                      | 45               |
| CS-MoS <sub>2</sub> -3 | 3108.79                           | 4                       | 86.4                                      | 45               |
| <b>N-TPCOP</b>         | <b>3400.38</b>                    | <b>3</b>                | <b>99.8</b>                               | <b>This work</b> |
| N-containing polymer   | 1073                              | 3                       | 94                                        | 54               |
| Tannin resins          | 343                               | 3                       | 81                                        | 56               |
| IXOS-AuC               | 1334                              | 3                       | 98                                        | 57               |
